1 **Co-radiation of *Leptospira* and Tenrecidae (Afrotheria) on**  
2 **Madagascar**

3

4 Yann Gomard<sup>1§</sup>, Steven M. Goodman<sup>2,3</sup>, Voahangy Soarimalala<sup>2</sup>, Magali Turpin<sup>1</sup>, Guenaëlle  
5 Lenclume<sup>1</sup>, Marion Ah-Vane<sup>1</sup>, Christopher D. Golden<sup>4,5</sup> and Pablo Tortosa<sup>1\*</sup>.

6

7 <sup>1</sup> Université de La Réunion, Unité Mixte de Recherche Processus Infectieux en Milieu Insulaire  
8 Tropical (UMR PIMIT), CNRS 9192, INSERM 1187, IRD 249, Plateforme Technologique CYROI,  
9 Sainte Clotilde, La Réunion, France.

10 <sup>2</sup> Association Vahatra, BP 3972, Antananarivo 101, Madagascar.

11 <sup>3</sup> Field Museum of Natural History, Chicago, Illinois 60605-2496, United States of America.

12 <sup>4</sup> Department of Nutrition, Harvard TH Chan School of Public Health, Boston, Massachusetts 02115,  
13 United States of America.

14 <sup>5</sup> Department of Environmental Health, Harvard TH Chan School of Public Health, Boston,  
15 Massachusetts 02115, United States of America.

16 <sup>§</sup> Current address: Université de La Réunion, UMR PVBMT, F-97410, Saint-Pierre, La Réunion,  
17 France.

18

19 Corresponding Author: Pablo Tortosa, [pablo.tortosa@univ-reunion.fr](mailto:pablo.tortosa@univ-reunion.fr)

## 20 **Abstract**

21 Leptospirosis is a bacterial zoonosis caused by pathogenic *Leptospira* that are maintained in the  
22 kidney lumen of infected animals acting as reservoirs and contaminating the environment via infected  
23 urine. The investigation of leptospirosis through a *One Health* framework has been stimulated by  
24 notable genetic diversity of pathogenic *Leptospira* together with a high infection prevalence in certain  
25 animal reservoirs. Studies of Madagascar's native mammal fauna have revealed a diversity of  
26 *Leptospira* with high levels of host-specificity. Native rodents, tenrecids, and bats shelter several  
27 distinct lineages and species of *Leptospira*, some of which have also been detected in acute human  
28 cases. Specifically, *Leptospira mayottensis*, first discovered in humans on Mayotte, an island  
29 neighboring Madagascar, was subsequently identified in a few species of Malagasy tenrecids, an  
30 endemic family of small mammals. Distinct *L. mayottensis* lineages were identified in shrew tenrecs  
31 (*Microgale cowani* and *Nesogale dobsoni*) on Madagascar, and later in spiny tenrecs (*Tenrec*  
32 *ecaudatus*) on Mayotte. These findings suggest that *L. mayottensis* (i) has co-radiated with tenrecids  
33 on Madagascar, and (ii) has recently emerged in human populations on Mayotte following the  
34 introduction of *T. ecaudatus* from Madagascar. Hitherto, *L. mayottensis* has not been detected in spiny  
35 tenrecs on Madagascar. In the present study, we broaden the investigation of Malagasy tenrecids and  
36 describe the presence of *L. mayottensis* in Malagasy *T. ecaudatus* and *M. thomasi*. These results  
37 confirm the hypothesis that *L. mayottensis* was introduced to Mayotte, presumably via *T. ecaudatus*,  
38 and provide additional data on the co-radiation of *Leptospira* and Tenrecidae.

39 **Keywords** Microbial endemism · *Leptospira mayottensis* · leptospirosis · tenrecids · Madagascar ·  
40 Mayotte

41

## 42 **Introduction**

43 Leptospirosis is a zoonotic disease that results annually in around 100 000 human cases and 58 000  
44 deaths [1]. Pathogenic *Leptospira* bacteria are maintained in the lumen of the kidney tubules of animal  
45 reservoirs [2], which can chronically shed viable bacteria in their urine and contaminate the  
46 environment [3]. Although humans can be infected through direct contact with infected reservoirs,  
47 indirect transmission during outdoor activities in the contaminated environment is most frequent [4].  
48 Infection leads to a wide range of symptoms ranging from mild flu-like syndromes to multi-organ  
49 failure causing death in 5-10% of the cases.

50         The genus *Leptospira* is currently composed of more than 60 species including saprophytic  
51 and pathogenic species [3, 5–8]. Investigations carried out in different areas of the world through a  
52 *One Health* approach have shown distinct transmission chains composed of species or lineages and  
53 reservoirs that vary from one environmental setting to another [9–13]. Investigations carried out in the  
54 ecosystems of Madagascar and surrounding islands, hereafter referred to as the Malagasy Region,  
55 have provided new information on transmission chains on the different islands [14]. Indeed, on La  
56 Réunion and in Seychelles, human leptospirosis is mostly caused by *Leptospira* that are broadly  
57 distributed and hence likely of introduced origin [11, 12]. By contrast, Madagascar and Mayotte, a  
58 French administrated Island belonging to the Comoros archipelago, shelter distinctly more diversified  
59 *Leptospira* assemblages, including species and lineages that can be considered endemic [15–17].

60         Among pathogenic *Leptospira* described and investigated in the Malagasy Region, *L.*  
61 *mayottensis*, the principal focus of the current study, warrants further characterization. These bacteria  
62 were first isolated from acute human leptospirosis cases on Mayotte and initially named *L.*  
63 *borgpetersenii* group B [9, 18]. A thorough characterization of serological and genomic features of  
64 these isolates led the French Reference Centre on Spirochetes to elevate this bacterium to the rank of a  
65 new species, which was named *L. mayottensis* in reference to the geographic origin of the human  
66 isolates [19]. A comprehensive investigation of the Malagasy wild mammal fauna allowed  
67 identification of *Leptospira* samples imbedded in the genetic clade of *L. mayottensis* and shed by two  
68 endemic small mammal species, namely *Microgale cowani* and *Nesogale dobsoni* [20]. These two

69 host species belong to the endemic family Tenrecidae, composed of omnivorous small mammals  
70 known to play an important role in *Leptospira* maintenance as reservoirs of two distinct species: *L.*  
71 *borgpetersenii* and *L. mayottensis* [17, 20, 21]. The origin of the Tenrecidae, a monophyletic group, is  
72 the result of a single colonization event originating from Africa that took place 30-56 My ago,  
73 followed by an extraordinary radiation leading to the currently known nearly 40 extant species or  
74 confirmed candidate species [22, 23]. These findings strongly suggest that *L. mayottensis* has co-  
75 radiated with tenrecid hosts on Madagascar.

76 It has been proposed that *L. mayottensis* was introduced to Mayotte from Madagascar [24].  
77 This was supported by an investigation of animal reservoirs on Mayotte identifying *Tenrec ecaudatus*,  
78 a spiny tenrec established from Madagascar for human consumption, as the local reservoir of *L.*  
79 *mayottensis*. However, the hypothesis that *T. ecaudatus* sheds *L. mayottensis* currently suffers from a  
80 lack of evidence for Malagasy populations of this animal. In the present investigation, we screened *T.*  
81 *ecaudatus* specimens together with other tenrecid species sampled on Madagascar to broaden  
82 information on the presence of *L. mayottensis* in these animals, and to test the hypothesis of *L.*  
83 *mayottensis* introduction to Mayotte associated with that of *T. ecaudatus*.

84

## 85 **Materials and Methods**

### 86 **Biological Sample**

87 All investigated shrew tenrecs were sampled in February 2016 in a forest neighbouring the village of  
88 Anjozorobe, in the Central Highlands of Madagascar (see Fig. 1). The samples included 31 specimens  
89 belonging to the following nine species: *Microgale taiva* (n=15), *M. thomasi* (n=3), *M. majori* (n=3),  
90 *M. parvula* (n=2), *M. soricoides* (n=2), *M. cowani* (n=1), *M. longicaudata* (n=1), *M. fotsifotsy* (n=1)  
91 and *Nesogale dobsoni* (n=3). The spiny tenrec samples composed of *T. ecaudatus* included 24  
92 specimens collected in villages adjacent to the Makira Natural Park in the Commune Antsirabe-  
93 Sahatany (Maroantsetra District) (Fig. 1), an area with heavy human hunting pressure [25]. All  
94 samples in this region were collected from captured animals provided by local hunters to the research  
95 team. All specimens were captured, manipulated and euthanized following guidelines accepted by the

96 scientific community for the handling of wild mammals [26] and in strict accordance with permits  
97 issued by Malagasy national authorities. All kidney samples from the collected animals from both  
98 project areas were immediately stored in ethanol 70% until DNA extraction and molecular analyses.

99

### 100 ***Leptospira* Detection and Sequencing**

101 For DNA extraction, kidneys were first rinsed with water and subsequently immersed in 2 mL of  
102 sterile water overnight. Then a thin transversal slice (approximately 0.5 mm thick) was cut in the  
103 central part of the kidney using a sterile scalpel, chopped in small pieces and then immersed into lysis  
104 buffer provided in the DNeasy Blood & Tissue Kit (Qiagen, Hilden, Germany) used for DNA  
105 extraction. All subsequent extraction steps employed the manufacturer's instructions. *Leptospira*  
106 detection was then carried out on 2 µL of eluted DNA using a probe-specific Real-Time Polymerase  
107 Chain Reaction system (RT-PCR) targeting a fragment of the 16S rRNA gene [27]. DNA templates  
108 leading to positive RT-PCR results were further subjected to an end-point PCR targeting the *secY*  
109 locus as previously described [20]. Amplicons were Sanger sequenced on both strands at GenoScreen  
110 (Lille, France) using the same PCR primers. The produced chromatograms were visually edited using  
111 Geneious software version 9.0.5 [28].

112

### 113 **Phylogeny**

114 A phylogeny was constructed for the *secY* gene based on the bacterial sequences generated in the  
115 present study and previous *secY* sequences from other research in the Malagasy Region [9, 15, 17, 20,  
116 24] (Table S1) and different *Leptospira* species were used as ingroups and outgroups. The best model  
117 of sequence evolution was determined with jModelTest v.2.1.4 [29]. Phylogenetic reconstructions  
118 were performed with MrBayes v.3.2.3 [30]. The analyses consisted of two independent runs of four  
119 incrementally heated Metropolis Coupled Markov Chain Monte Carlo (MCMCMC) starting from a  
120 random tree. MCMCMC was run for 2 million generations with trees and associated model parameters  
121 sampled every 100 generations. The convergence level of each phylogeny was validated by an average  
122 standard deviation of split frequencies inferior to 0.05. The initial 10% of trees for each run were  
123 discarded as burn-in and the consensus phylogeny along with posterior probabilities were obtained

124 from the remaining trees. The resulting Bayesian phylogenies were visualized, annotated and rooted to  
125 midpoint with FigTree v.1.4.2 [31].

126

## 127 **Results**

### 128 **Detection of *Leptospira* in Samples and Sequencing**

129 The detection by RT-PCR indicates a global leptospiral infection rate of 7.3% (4/55) with bacteria  
130 detected in three out of the nine tested tenrecids species: *M. taiva* (1 positive specimen), *M. thomasi* (2  
131 positive specimens), and *T. ecaudatus* (1 positive specimen). The PCR protocols allowed to obtain  
132 leptospiral *secY* sequences from the RT-PCR positive *T. ecaudatus* and from one out of the two RT-  
133 PCR positive *M. thomasi*. No *secY* sequence was obtained from the second RT-PCR positive *M.*  
134 *thomasi* or from the RT-PCR positive *M. taiva*.

135

### 136 **Phylogenetic Analysis**

137 We present in Fig. 1 the Bayesian phylogeny obtained from the *secY* gene. Within this phylogeny, the  
138 bacterial sequences obtained from *T. ecaudatus* and *M. thomasi* fall in the *L. mayottensis* clade and  
139 form a well-supported subclade with a leptospiral sequence obtained from *N. dobsoni*. This subclade is  
140 related to one subclade of *L. mayottensis* detected in humans and tenrecs from Mayotte. All previously  
141 reported *Leptospira* sequences from *Microgale* and *Nesogale* species fall within two distinct clades: *L.*  
142 *borgpetersenii* (*M. longicaudata*, *M. principula* and *M. majori*) and *L. mayottensis* (*M. cowani* and *N.*  
143 *dobsoni*). Our results further support this topology with the detection of *L. mayottensis* in *M. thomasi*  
144 and Malagasy populations of *T. ecaudatus*.

145

## 146 **Discussion**

147 The Tenrecidae are placental mammals grouped within a monophyletic family endemic to Madagascar  
148 and composed of nearly 40 species, including confirmed candidate species [22, 23, 32]. This highly  
149 diversified family is currently considered the result from a single colonization event originating from  
150 East Africa that took place between 30 and 56 My ago, followed by speciation that resulted in an

151 exceptional adaptive radiation [33, 34]. Some tenrecids exhibit a number of biological features unique  
152 among mammals, such as the ability of hibernating without interbout arousal, partial heterothermy or  
153 elementary echolocation [32, 35].

154 The long evolutionary history of the Tenrecidae also makes these mammals suitable for  
155 investigating the evolution of host-parasite interactions. Tenrecids host a diversity of  
156 Paramyxoviruses, some of which having experienced host switches with introduced murid rodents  
157 [36]. Tenrecidae are known to be hosts of two species of pathogenic *Leptospira*, namely *L.*  
158 *borgpetersenii* and *L. mayottensis* [17, 20, 24]. While *L. mayottensis* has been largely identified in  
159 tenrecids or acute human cases, a study on Madagascar reported the presence of *L. mayottensis* in  
160 introduced *Rattus rattus* but only as co-infections with other *Leptospira* species [37]. The strong host-  
161 specificity of *L. mayottensis* towards tenrecids was recently tested through experimental infection in  
162 which *L. mayottensis* isolated from *T. ecaudatus* failed to colonize the kidneys of *R. norvegicus* [38].  
163 The present study was carried out to (i) further explore the diversity of *L. mayottensis* sheltered by  
164 tenrecids and (ii) confirm a previous hypothesis that proposed *L. mayottensis* arrived on Mayotte with  
165 the introduction of *T. ecaudatus* for human consumption.

166 Analysed samples confirmed tenrecids as being a reservoir of *L. mayottensis* and added *M.*  
167 *thomasi* to the list of animal reservoirs of this pathogenic bacteria. Of particular importance, we report  
168 the first characterization of *L. mayottensis* from *T. ecaudatus* on Madagascar. Together with previous  
169 data reported on Mayotte [24], the present work supports the introduction of this mammal species  
170 being associated with the emergence of a zoonotic human pathogen, *L. mayottensis*, on Mayotte.  
171 *Tenrec ecaudatus* has also been introduced to other islands in the Malagasy Region with the purpose  
172 of providing bush meat, most notably La Réunion, Mauritius, Mahé (Seychelles) and other islands in  
173 the Comoros archipelago, but to our knowledge *L. mayottensis* has been not isolated in these non-  
174 native *T. ecaudatus* populations or reported in local human inhabitants.

175 In conclusion, the data presented herein also strongly support that *L. mayottensis* is an  
176 endemic zoonotic pathogen to Madagascar. It has been hypothesized nearly a century ago that the  
177 extreme abundance and unbounded dispersal capacities of microorganisms limit endemism, with the  
178 exception of some extreme environments, and that biogeographical patterns result from contemporary

179 selective pressures rather than from limited dispersal capacity. This dogma, often referred to as Bass  
180 Becking hypothesis - “*everything is everywhere but the environment selects*” [39] - has been  
181 increasingly challenged, but microbial biogeography is still in its infancy [40, 41]. The present study  
182 supports that host-specificity needs be considered as a driver of microbial endemism: the dispersal  
183 capacities of host-specific microbes is indeed limited by that of their hosts. In other words, when  
184 considering host-parasite pairs, the dispersal capacities of hosts drive the biogeographical patterns of  
185 their associated microorganisms and may, in the case of strong host-parasite specificity, lead to  
186 microbial endemism.

187

188 **Acknowledgements.** We thank the Malagasy authorities (in particular to the former Ministère de  
189 l’Environnement, Ecologie et des Forêts, now Ministère de l’Environnement et du Développement  
190 Durable) for granting the research permits.

191

192



## 193 **References**

- 194 1. Costa F, Hagan JE, Calcagno J, et al (2015) Global morbidity and mortality of leptospirosis: a  
195 systematic review. *PLoS Negl Trop Dis* 9:e0003898.  
196 <https://doi.org/10.1371/journal.pntd.0003898>
- 197  
198 2. Ristow P, Bourhy P, Kerneis S, et al (2008) Biofilm formation by saprophytic and pathogenic  
199 leptospire. *Microbiol* 154:1309–1317. <https://doi.org/10.1099/mic.0.2007/014746-0>
- 200  
201 3. Adler B (2015) *Leptospira* and Leptospirosis. Springer-Verlag, Berlin Heidelberg
- 202  
203 4. Ko AI, Goarant C, Picardeau M (2009) *Leptospira*: the dawn of the molecular genetics era for  
204 an emerging zoonotic pathogen. *Nat Rev Microbiol* 7:736–747.  
205 <https://doi.org/10.1038/nrmicro2208>
- 206  
207 5. Masuzawa T, Sakakibara K, Saito M, et al (2018) Characterization of *Leptospira* species  
208 isolated from soil collected in Japan. *Microbiol and Immunol* 62:55–59.  
209 <https://doi.org/10.1111/1348-0421.12551>
- 210  
211 6. Thibeaux R, Iraola G, Ferrés I, et al (2018) Deciphering the unexplored *Leptospira* diversity  
212 from soils uncovers genomic evolution to virulence. *Microb Genom* 4:e000144.  
213 <https://doi.org/10.1099/mgen.0.000144>
- 214  
215 7. Thibeaux R, Girault D, Bierque E, et al (2018) Biodiversity of environmental *Leptospira*:  
216 improving identification and revisiting the diagnosis. *Front Microbiol* 9:816.  
217 <https://doi.org/10.3389/fmicb.2018.00816>
- 218  
219 8. Vincent AT, Schiettekatte O, Goarant C, et al (2019) Revisiting the taxonomy and evolution  
220 of pathogenicity of the genus *Leptospira* through the prism of genomics. *PLoS Negl Trop Dis*  
221 13:e0007270. <https://doi.org/10.1371/journal.pntd.0007270>

- 222 9. Bourhy P, Collet L, Lernout T, et al (2012) Human *Leptospira* isolates circulating in Mayotte  
223 (Indian Ocean) have unique serological and molecular features. J Clin Microbiol 50:307–311.  
224 <https://doi.org/10.1128/JCM.05931-11>
- 225  
226 10. Cosson J-F, Picardeau M, Mielcarek M, et al (2014) Epidemiology of *Leptospira* transmitted  
227 by rodents in southeast Asia. PLoS Negl Trop Dis 8:e2902.  
228 <https://doi.org/10.1371/journal.pntd.0002902>
- 229  
230 11. Guernier V, Lagadec E, Cordonin C, et al (2016) Human leptospirosis on Reunion Island,  
231 Indian Ocean: are rodents the (only) ones to blame? PLoS Negl Trop Dis 10:e0004733.  
232 <https://doi.org/10.1371/journal.pntd.0004733>
- 233  
234 12. Biscornet L, Dellagi K, Pagès F, et al (2017) Human leptospirosis in Seychelles: a prospective  
235 study confirms the heavy burden of the disease but suggests that rats are not the main  
236 reservoir. PLoS Negl Trop Dis 11:e0005831. <https://doi.org/10.1371/journal.pntd.0005831>
- 237  
238 13. Guernier V, Richard V, Nhan T, et al (2017) *Leptospira* diversity in animals and humans in  
239 Tahiti, French Polynesia. PLoS Negl Trop Dis 11:e0005676.  
240 <https://doi.org/10.1371/journal.pntd.0005676>
- 241  
242 14. Gomard Y, Dellagi KM, Goodman S, et al (2021) Tracking animal reservoirs of pathogenic  
243 *Leptospira*: the right test for the right claim. Trop Med Infect Dis 6:205.  
244 <https://doi.org/10.3390/tropicalmed6040205>
- 245  
246 15. Gomard Y, Dietrich M, Wieseke N, et al (2016) Malagasy bats shelter a considerable genetic  
247 diversity of pathogenic *Leptospira* suggesting notable host-specificity patterns. FEMS  
248 Microbiol Ecol. <https://doi.org/10.1093/femsec/fiw037>
- 249

- 250 16. Tortosa P, Dellagi K, Mavingui P (2017) Leptospiroses on the French islands of the Indian  
251 Ocean. *Bulletin Epidemiologique Hebdomadaire - BEH* 8–9
- 252  
253 17. Dietrich M, Gomard Y, Lagadec E, et al (2018) Biogeography of *Leptospira* in wild animal  
254 communities inhabiting the insular ecosystem of the western Indian Ocean islands and  
255 neighboring Africa. *Emerg Microbes Infect* 7:57. <https://doi.org/10.1038/s41426-018-0059-4>
- 256  
257 18. Bourhy P, Collet L, Clément S, et al (2010) Isolation and characterization of new *Leptospira*  
258 genotypes from patients in Mayotte (Indian Ocean). *PLoS Negl Trop Dis* 4:e724.  
259 <https://doi.org/10.1371/journal.pntd.0000724>
- 260  
261 19. Bourhy P, Collet L, Brisse S, Picardeau M (2014) *Leptospira mayottensis* sp. nov., a  
262 pathogenic species of the genus *Leptospira* isolated from humans. *Int J Syst Evol Microbiol*  
263 64:4061–4067. <https://doi.org/10.1099/ijs.0.066597-0>
- 264  
265 20. Dietrich M, Wilkinson DA, Soarimalala V, et al (2014) Diversification of an emerging  
266 pathogen in a biodiversity hotspot: *Leptospira* in endemic small mammals of Madagascar.  
267 *Mol Ecol* 23:2783–2796. <https://doi.org/10.1111/mec.12777>
- 268  
269 21. Dietrich M, Gomard Y, Cordonin C, Tortosa P (In press) *Leptospira* bacteria in Madagascar.  
270 In: *The new natural history of Madagascar*, S.M Goodman (ed), Princeton University Press.  
271 Princeton
- 272  
273 22. Everson KM, Soarimalala V, Goodman SM, Olson LE (2016) Multiple loci and complete  
274 taxonomic sampling resolve the phylogeny and biogeographic history of Tenrecs (Mammalia:  
275 Tenrecidae) and reveal higher speciation rates in Madagascar’s humid forests. *Syst Biol*  
276 65:890–909. <https://doi.org/10.1093/sysbio/syw034>
- 277

- 278 23. Goodman SM, Soarimalala V, Olson LE (2018) Systématique des tenrecs endémiques  
279 malgaches (famille des Tenrecidae) / Systematics of endemic Malagasy tenrecs (family  
280 Tenrecidae). In: Les aires protégées terrestres de Madagascar: leur histoire, description, et  
281 biote. / The terrestrial protected areas of Madagascar: Their history, description, and biota,  
282 S.M Goodman, M. J., and S. Wohlhauser (eds). Association Vahatra, pp 363–372
- 283  
284 24. Lagadec E, Gomard Y, Minter GL, et al (2016) Identification of *Tenrec ecaudatus*, a wild  
285 mammal introduced to Mayotte Island, as a reservoir of the newly identified human  
286 pathogenic *Leptospira mayottensis*. PLoS Negl Trop Dis 10:e0004933.  
287 <https://doi.org/10.1371/journal.pntd.0004933>
- 288  
289 25. Annapragada A, Brook CE, Luskin MS, et al (2021) Evaluation of tenrec population viability  
290 and potential sustainable management under hunting pressure in northeastern Madagascar.  
291 Anim Conserv 24:1059–1070. <https://doi.org/10.1111/acv.12714>
- 292  
293 26. Sikes R, Gannon W, The Animal Care and Use Committee of the American Society of  
294 Mammalogists (2011) Guidelines of the American Society of Mammalogists for the use of  
295 wild mammals research. J Mammal 92:235–253. <https://doi.org/10.1644/10-MAMM-F-355.1>
- 296  
297 27. Smythe LD, Smith IL, Smith GA, et al (2002) A quantitative PCR (TaqMan) assay for  
298 pathogenic *Leptospira* spp. BMC Infect Dis 2:13. <https://doi.org/10.1186/1471-2334-2-13>
- 299  
300 28. Kearse M, Moir R, Wilson A, et al (2012) Geneious Basic: an integrated and extendable  
301 desktop software platform for the organization and analysis of sequence data. Bioinformatics  
302 28:1647–1649. <https://doi.org/10.1093/bioinformatics/bts199>
- 303  
304 29. Darriba D, Taboada GL, Doallo R, Posada D (2012) jModelTest 2: more models, new  
305 heuristics and parallel computing. Nat Methods 9:772–772.  
306 <https://doi.org/10.1038/nmeth.2109>

- 307  
308 30. Ronquist F, Teslenko M, van der Mark P, et al (2012) MrBayes 3.2: efficient Bayesian  
309 phylogenetic inference and model choice across a large model space. *Syst Biol* 61:539–542.  
310 <https://doi.org/10.1093/sysbio/sys029>
- 311  
312 31. Rambaut A (2014) FigTree 1.4.2 software. Institute of Evolutionary Biology, University of  
313 Edinburgh
- 314  
315 32. Olson LE (2013) Tenrecs. *Curr Biol* 23:R5–R8. <https://doi.org/10.1016/j.cub.2012.11.015>
- 316  
317 33. Emerson BC (2002) Evolution on oceanic islands: molecular phylogenetic approaches to  
318 understanding pattern and process. *Mol Ecol* 11:951–966. [https://doi.org/10.1046/j.1365-](https://doi.org/10.1046/j.1365-294x.2002.01507.x)  
319 [294x.2002.01507.x](https://doi.org/10.1046/j.1365-294x.2002.01507.x)
- 320  
321 34. Krause DW (2010) Washed up in Madagascar. *Nature* 463:613–614.  
322 <https://doi.org/10.1038/463613a>
- 323  
324 35. Lovegrove BG, Lobban KD, Levesque DL (2014) Mammal survival at the Cretaceous–  
325 Palaeogene boundary: metabolic homeostasis in prolonged tropical hibernation in tenrecs.  
326 *Proc Biol Sci* 281:20141304. <https://doi.org/10.1098/rspb.2014.1304>
- 327  
328 36. Wilkinson DA, Mélade J, Dietrich M, et al (2014) Highly diverse Morbillivirus-related  
329 paramyxoviruses in wild fauna of the southwestern Indian Ocean islands: evidence of  
330 exchange between introduced and endemic small mammals. *J Virol* JVI.01211-14.  
331 <https://doi.org/10.1128/JVI.01211-14>
- 332  
333 37. Moseley M, Rahelinirina S, Rajerison M, et al (2018) Mixed *Leptospira* Infections in a diverse  
334 reservoir host community, Madagascar, 2013–2015. *Emerg Infect Dis* 24:1138–1140.  
335 <https://doi.org/10.3201/eid2406.180035>

- 336  
337 38. Cordonin C, Turpin M, Bringart M, et al (2020) Pathogenic *Leptospira* and their animal  
338 reservoirs: testing host specificity through experimental infection. *Sci Rep* 10:7239.  
339 <https://doi.org/10.1038/s41598-020-64172-4>
- 340  
341 39. Baas Becking L (1934) *Geobiologie of Inleiding Tot de Milieukunde*, W. P. Van  
342 Stockum&Zoon. The Hague, Netherlands
- 343  
344 40. de Wit R, Bouvier T (2006) ‘Everything is everywhere, but, the environment selects’; what  
345 did Baas Becking and Beijerinck really say? *Environ Microbiol* 8:755–758.  
346 <https://doi.org/10.1111/j.1462-2920.2006.01017.x>
- 347  
348 41. Fierer N (2008) Microbial biogeography: patterns in microbial diversity across space and time.  
349 In: Zengler K (ed) *Accessing uncultivated microorganisms: from the environment to*  
350 *organisms and genomes and back*. Amer Soc Microbiology, Washington, pp 95–115
- 351  
352 42. Becker RA, Wilks AR (2018) R version by Ray Brownrigg. mapdata: Extra Map Databases  
353 (version 2.3.0)

354  
355  
356

357 **Statements and Declarations**

358 **Funding.** The authors declare that no funds, grants, or other support were received during the  
359 preparation of this manuscript.

360 **Competing interests.** The authors declare that they have no competing interest.

361 **Author Contributions.** Pablo Tortosa, Steven M. Goodman and Christopher D. Golden conceived  
362 the study. Steven M. Goodman and Christopher D. Golden and Voahangy Soarimalala collected the  
363 samples on the field. Magali Turpin, Guenaëlle Lenclume, Marion Ah-Vane and Yann Gomard  
364 performed laboratory manipulations. Yann Gomard performed the analysis. Pablo Tortosa, Yann  
365 Gomard, Steven M. Goodman and Christopher D. Golden drafted the first version of the manuscript.  
366 All authors contributed to the final version of the manuscript.

367 **Data availability.** The produced sequences were deposited in GenBank under the accession numbers  
368 MT442041 and MT442042.

369 **Ethics approval.** Biological sampling permits were obtained from the Ministry of Environment and  
370 Forests and registered under the following references 20/16/MEEMF/SG/DGF/DAPT/SCBT.Re and  
371 85/18/MEEF/SG/DGF/DSAP/SCB.Re.

372

373 **Figure Legend**

374 **Fig. 1:** Geographical context and Bayesian phylogenetic tree of *Leptosira* species from Mayotte  
375 (blue) and Madagascar (green) based on *secY* gene (482 bp). Sequences in black colour correspond to  
376 *Leptosira* species used as ingroups and outgroup (*L. biflexa*). The accession number is indicated for  
377 each sequence. The analysis was conducted under the HKY+I+G substitution model and the tree is  
378 midpoint rooted. Black circles at the nodes indicate posterior probabilities superior or equal to 0.90.  
379 The red stars indicate new sequences generated in the present study and were obtained from two  
380 regions on Madagascar: Anjozorobe and Antsirabe-Sahatany. The map was realised using *worldHires*  
381 function in *mapdata* package [42] under the R software version 4.1.1.

382

383 **Supplementary materials**

384 **Table S1** Details on *Leptospira secY* sequences from Mayotte and Madagascar used in the present  
385 study: host families and species, geographical origins, *Leptospira* species and GenBank accession  
386 number.

387 The asterisks indicate sequences generated in the present study.



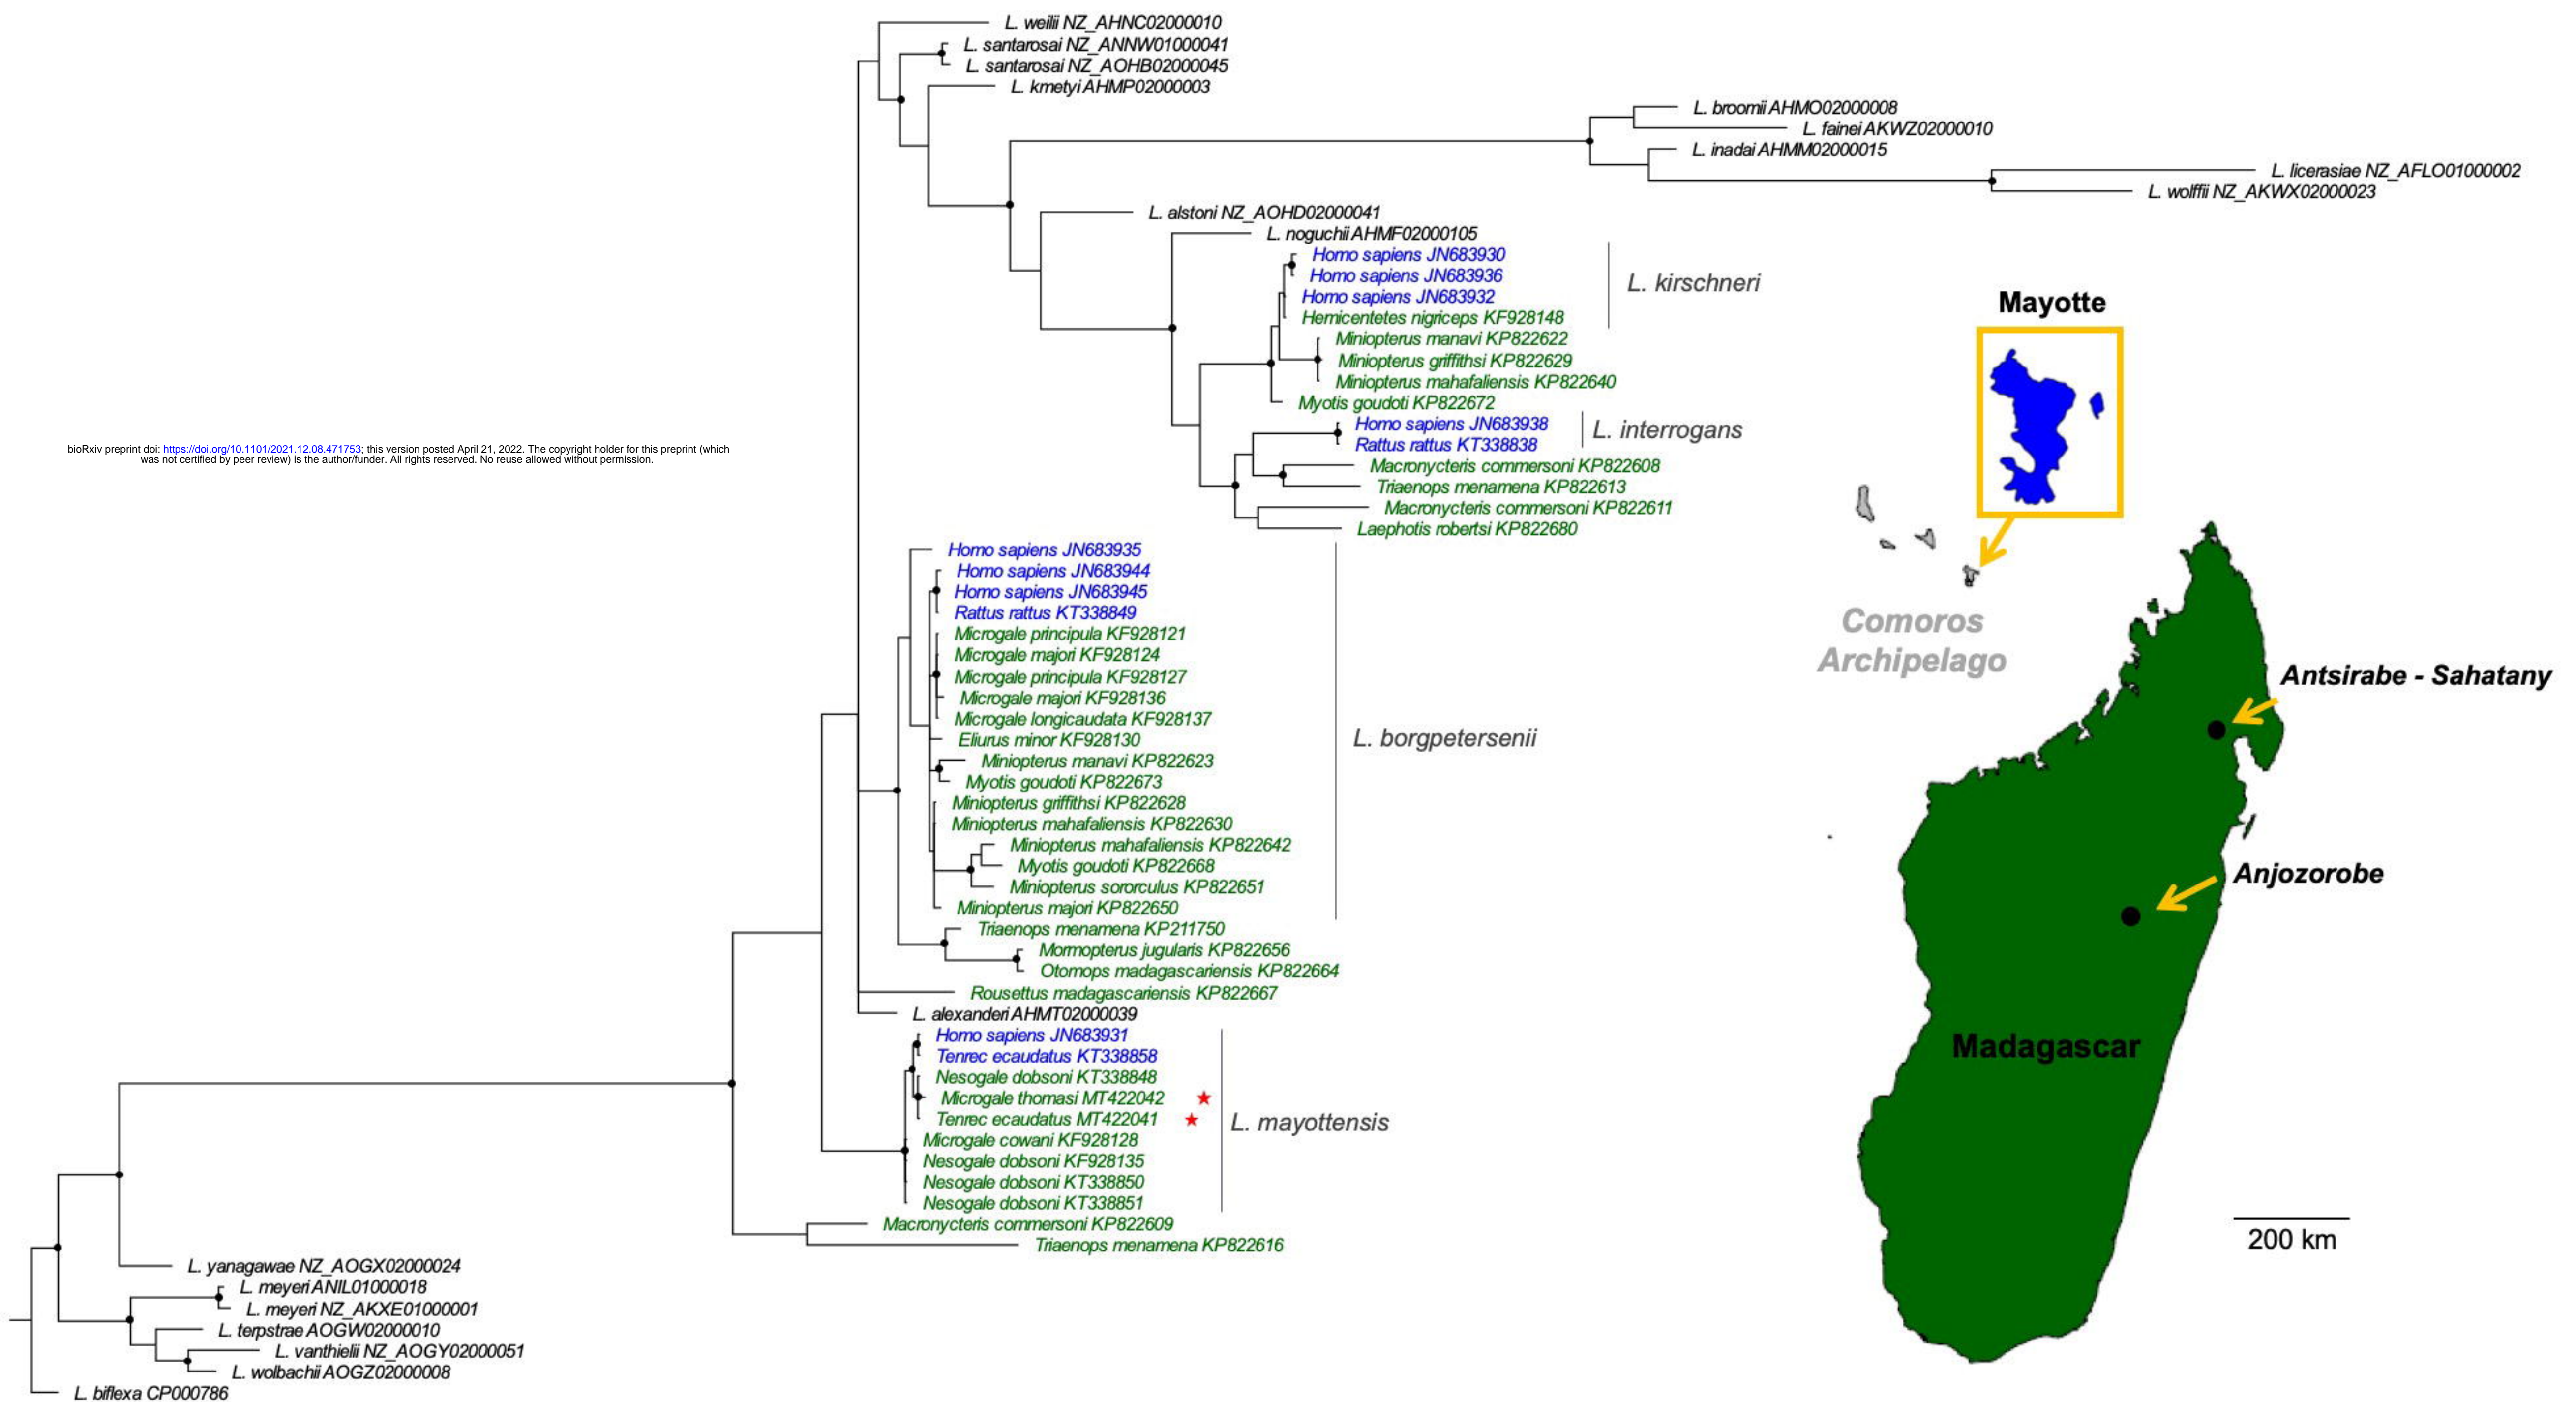

Source: https://www.biorxiv.org/content/10.1101/2021.12.08.471753v2.full.pdf
